# Supplementary material for: Mindfulness-Based Interventions for Undergraduate Nursing Students in a University Setting: A Narrative Review
Source: MDPI journal article supplement (doi:10.3390/healthcare9111493), 2021-11-02
Supplement: s1 [file s1]

Table S1. Characteristics of Studies.

| Author (year)         | Country | Design                   | Sample size      | Participants                                                                                                                             | Intervention | Intervention period                                                                                              | Outcome Measures                            | Results                                                                                                                                                                                                                                                                                                                                                                            |
|-----------------------|---------|--------------------------|------------------|------------------------------------------------------------------------------------------------------------------------------------------|--------------|------------------------------------------------------------------------------------------------------------------|---------------------------------------------|------------------------------------------------------------------------------------------------------------------------------------------------------------------------------------------------------------------------------------------------------------------------------------------------------------------------------------------------------------------------------------|
| Barbosa et al. (2013) | USA     | Quasi-experimental trial | 13 (I)<br>15 (C) | UG nursing Student (n=4)<br>Podiatry students (n=7)<br>Physician assistant (n=5)<br>Physical Therapy (n=7)<br>Occupational Therapy (n=5) | MBSR         | Students attended eight weekly classes for 2.5 hours, plus an 8-hour silent day-long retreat during the 6th week | Anxiety [41], Empathy [42] and Burnout [43] | For the intervention group, 85% of students experienced diminished anxiety, from baseline, at both 8 and 11 weeks. For the control group, 13% and 27% of students experienced diminished anxiety at weeks 8 and 11. Findings were statistically significant ( $P<0.001$ and $P<0.01$ , respectively).<br><br>In relation to empathy, a significant difference was observed between |

|                            |     |     |                  |                     |                        |                            |                                                                                                                                                                                                                                                                                                                                                            |
|----------------------------|-----|-----|------------------|---------------------|------------------------|----------------------------|------------------------------------------------------------------------------------------------------------------------------------------------------------------------------------------------------------------------------------------------------------------------------------------------------------------------------------------------------------|
|                            |     |     |                  |                     |                        |                            | the experimental and control groups at week 8 ( $P < 0.0096$ ), but this was not sustained at week 11.                                                                                                                                                                                                                                                     |
|                            |     |     |                  |                     |                        |                            | In relation to burnout, there were no statistical differences between the control and experimental groups. Meditation demonstrated moderate strength for enhancing executive attention, $F = 4.26$ (1, 49), $n^2 = .080$ , $p = .044$ . Additional outcomes specific to the meditation group were reduced stress and increased mindfulness, $F = 7.16$ (2, |
| Burger and Lockhart (2017) | USA | RCT | 28 (I)<br>24 (C) | UG Nursing Students | Mindfulness Meditation | 10 mins daily over 4 weeks | Attention [44], stress [45] and mindfulness [46]                                                                                                                                                                                                                                                                                                           |

|                     |        |     |                  |                     |                        |                                              |                                                                     |                                                                                                                                                                                                                                                                                                                                                                                                 |
|---------------------|--------|-----|------------------|---------------------|------------------------|----------------------------------------------|---------------------------------------------------------------------|-------------------------------------------------------------------------------------------------------------------------------------------------------------------------------------------------------------------------------------------------------------------------------------------------------------------------------------------------------------------------------------------------|
|                     |        |     |                  |                     |                        |                                              |                                                                     | 47), $n^2 = .234$ , $p = .002$ .                                                                                                                                                                                                                                                                                                                                                                |
|                     |        |     |                  |                     |                        |                                              |                                                                     | Differences between pre- and post-treatment Self-Rating Anxiety Scale scores were significantly larger in the meditation group than in the control group, but no similar effect was observed for Self-Rating Depression Scale scores. Systolic blood pressure was reduced more after the intervention in the meditation group than in the control group, with an average reduction of 2.2 mmHg. |
| Chen et al. (2013)  | China  | RCT | 30 (I)<br>30 (C) | UG Nursing Students | Mindfulness Meditation | 30min daily for 7 consecutive days           | Anxiety [47], depression [48] and autonomic nervous system activity | Statistically significant difference in stress reduction at mean post-test                                                                                                                                                                                                                                                                                                                      |
| Karaca et al. 2019) | Turkey | RCT | 190              | UG Nursing Students | MBSR                   | 90-95 min sessions twice weekly for 12 weeks | Stress [49] and mindfulness [50]                                    |                                                                                                                                                                                                                                                                                                                                                                                                 |

---

|                 |     |                                                              |                                                                          |                        |                         |                                                                                                                                                                                              |                                   |                                                                                                                                                                                                                                                                                                                                                                      |
|-----------------|-----|--------------------------------------------------------------|--------------------------------------------------------------------------|------------------------|-------------------------|----------------------------------------------------------------------------------------------------------------------------------------------------------------------------------------------|-----------------------------------|----------------------------------------------------------------------------------------------------------------------------------------------------------------------------------------------------------------------------------------------------------------------------------------------------------------------------------------------------------------------|
| Koren<br>(2017) | USA | 2 x Pilot<br>quasi-<br>experime<br>ntal<br>design<br>studies | Study 1:<br>8 (E)<br>and 5<br>(C)<br>Study 2:<br>32 (E)<br>and 27<br>(C) | UG Nursing<br>Students | Mindfulness<br>training | Study 1: 10-<br>minute<br>mindfulness<br>training once<br>a week for<br>six weeks<br><br>Study 2: Five<br>mindfulness<br>interventions<br>for 10<br>minutes over<br>a period of<br>11 weeks. | Stress [45] and<br>Awareness [51] | and mean follow-<br>up for the control<br>and intervention<br>groups.<br>Statistically<br>significant<br>difference in<br>Mindfulness<br>scores between<br>mean pre-test and<br>post-test obtained<br>by the<br>intervention and<br>control groups.<br>Decreased<br>nursing students'<br>stress and<br>increased<br>awareness, but<br>did not reach<br>significance. |
|-----------------|-----|--------------------------------------------------------------|--------------------------------------------------------------------------|------------------------|-------------------------|----------------------------------------------------------------------------------------------------------------------------------------------------------------------------------------------|-----------------------------------|----------------------------------------------------------------------------------------------------------------------------------------------------------------------------------------------------------------------------------------------------------------------------------------------------------------------------------------------------------------------|

---

|                              |             |                                  |                    |                     |                                        |                                                            |                                                 |                                                                                                                                                                                                                                                 |
|------------------------------|-------------|----------------------------------|--------------------|---------------------|----------------------------------------|------------------------------------------------------------|-------------------------------------------------|-------------------------------------------------------------------------------------------------------------------------------------------------------------------------------------------------------------------------------------------------|
| Marthiensen et al. (2019)    | Canada      | Qualitative                      | 5                  | UG Nursing Students | Brief MBSR                             | 2 x 4-hour training sessions and 4 weeks of daily practice | N/A                                             | Four themes: (a) hitting a reset button, (b) self-compassion, (c) avoiding a downward spiral, and (d) using an internal coping mechanism. 28 students in the intervention group and eight in the control group completed the pre- and post-test |
| Niessen and Jacobs (2014)    | Netherlands | Mixed Methods Pilot cohort study | 123 (I)<br>78 (WL) | UG Nursing Students | Mindfulness Meditation                 | 4-week intervention                                        | Mindfulness [46] and self-compassion scale [52] | questionnaires, findings did have statistical significance. Two qualitative themes: (a) Self-reflection and self-insight (b) Expectations of the training Biofeedback significantly reduced anxiety and maintained stress levels in             |
| Ratanasiripong et al. (2015) | USA         | RCT                              | 89                 | UG Nursing Students | Biofeedback and Mindfulness Meditation | Group 1: Biofeedback 3 times per day for 4 weeks           | Anxiety [53] and stress [45]                    |                                                                                                                                                                                                                                                 |

|                        |     |                                                                 |    |                                                  |                          |                                                                            |                                                 |                                                                                                                                                                                                                                                                                                                                                                                                                                                                                                                                                                                                      |
|------------------------|-----|-----------------------------------------------------------------|----|--------------------------------------------------|--------------------------|----------------------------------------------------------------------------|-------------------------------------------------|------------------------------------------------------------------------------------------------------------------------------------------------------------------------------------------------------------------------------------------------------------------------------------------------------------------------------------------------------------------------------------------------------------------------------------------------------------------------------------------------------------------------------------------------------------------------------------------------------|
| Sanko et al.<br>(2016) | USA | Time<br>series,<br>two<br>group<br>interventi<br>onal<br>design | 27 | UG (n=20)<br>and PG (n=7)<br>Nursing<br>Students | Mindfulness<br>Programme | Group 2:<br>Mindfulness<br>Meditation 3<br>times per<br>day for 4<br>weeks | Mindfulness [54]<br>and Moral<br>Judgement [55] | nursing students.<br>Mindfulness<br>meditation<br>similarly<br>decreased anxiety<br>levels, while also<br>significantly<br>lowering stress<br>levels. The<br>biofeedback<br>group exhibited<br>significant<br>reduction in<br>anxiety levels<br>among the three<br>groups at post<br>intervention<br>Improvement in<br>mindfulness<br>scores $p = 0.003$<br>was found. UG<br>nursing students<br>did not show a<br>statistically<br>significant<br>improvement in<br>mindfulness<br>scores pre to post<br>training<br>( $p = 0.281$ ),<br>however the post<br>graduate group<br>did ( $p = 0.004$ ). |
|                        |     |                                                                 |    |                                                  |                          |                                                                            |                                                 |                                                                                                                                                                                                                                                                                                                                                                                                                                                                                                                                                                                                      |

|                           |             |                   |                   |                     |             |                                    |                                                             |                                                                                                                                                                                                                                                                                                                                                                                                                                                                                          |
|---------------------------|-------------|-------------------|-------------------|---------------------|-------------|------------------------------------|-------------------------------------------------------------|------------------------------------------------------------------------------------------------------------------------------------------------------------------------------------------------------------------------------------------------------------------------------------------------------------------------------------------------------------------------------------------------------------------------------------------------------------------------------------------|
| Song and Lindquist (2014) | South Korea | RCT               | 25 (I)<br>25 (WL) | UG Nursing Students | MBSR        | 2h session once weekly for 8 weeks | Depression, anxiety and stress [56] and mindfulness [57]    | Statistically significant pre - post scores were found in moral judgement scores (P [Post conventional] score, $p = 0.039$ and N2 [Maintaining norms] score, $p = 0.032$ ). Compared with WL participants, MBSR participants reported significantly greater decreases in depression, anxiety and stress, and greater increase in mindfulness. Stress was significantly reduced ( $F(2,24) = 4.163$ , $p = .019$ ). A decreasing trend for anxiety was noted with significant difference. |
| Spadaro and Hunker (2016) | USA         | Descriptive study | 26                | UG Nursing Students | Online MBSR | 1 x session per week for 8 weeks   | Stress [45], Anxiety and Depression [58] and cognition [44] |                                                                                                                                                                                                                                                                                                                                                                                                                                                                                          |

|                            |           |                                |    |                     |                                           |                              |     |                                                                                                                                                                                                                                                                                                                                                                                                                                                                                                                                          |
|----------------------------|-----------|--------------------------------|----|---------------------|-------------------------------------------|------------------------------|-----|------------------------------------------------------------------------------------------------------------------------------------------------------------------------------------------------------------------------------------------------------------------------------------------------------------------------------------------------------------------------------------------------------------------------------------------------------------------------------------------------------------------------------------------|
| Van der Riet et al. (2015) | Australia | Descriptive qualitative design | 10 | UG Nursing Students | Stress management and mindfulness program | 7 x one-hour weekly sessions | N/A | <p>between time points (<math>F(1,23) = 6.889, p = .015</math>) when practice frequency was weekly to daily. Cognition: ability to shift attention, attention selection, concentration, and accuracy improved</p> <p>Three main themes emerged: (a) attending to self, (b) attending to others and (c) attending to program related challenges. Data indicated a positive impact on sleep, concentration, clarity of thought and a reduction in negative cognitions. Participants also identified challenges related to timetabling,</p> |
|----------------------------|-----------|--------------------------------|----|---------------------|-------------------------------------------|------------------------------|-----|------------------------------------------------------------------------------------------------------------------------------------------------------------------------------------------------------------------------------------------------------------------------------------------------------------------------------------------------------------------------------------------------------------------------------------------------------------------------------------------------------------------------------------------|



|                          |        |                                                  |     |                                               |                                                        |                                        |                                                       |                                                                                                                                                                                                                                                                                                                                                                                                                                                                                             |
|--------------------------|--------|--------------------------------------------------|-----|-----------------------------------------------|--------------------------------------------------------|----------------------------------------|-------------------------------------------------------|---------------------------------------------------------------------------------------------------------------------------------------------------------------------------------------------------------------------------------------------------------------------------------------------------------------------------------------------------------------------------------------------------------------------------------------------------------------------------------------------|
| VanKuiken et al. (2017)  | USA    | Descriptive Survey study                         | 151 | UG (n=59) and PG (n=92) Nursing Students      | Mindfulness meditation and mindful movement strategies | Beginning of class for a full semester | N/A                                                   | program structure and venue. Four themes emerged: (a) calming/relaxing; (b) focusing/centering; (c) setting aside distractions; and (d) feeling community and connection. Three main themes were identified: (a) ability to be more present, (b) increased perception and awareness of self, and (c) connection on a deeper level with others. Outcomes measured at pre- and post-intervention, and at a 4-months follow-up. The post-test mean scores of Mindful Attention Awareness Scale |
| Vilet et al. (2018)      | Sweden | Phenomenological hermeneutical qualitative study | 26  | UG Nursing (n=15) and Medical (n=11) students | Mind-Body skills Course                                | 4 h per week for 5 weeks               | N/A                                                   |                                                                                                                                                                                                                                                                                                                                                                                                                                                                                             |
| Yuksel and Yilmaz (2019) | Turkey | Quasi-experimental study                         | 82  | UG Nursing Students                           | Mindfulness-based cognitive therapy                    | 8 x weekly two-hour sessions           | Depression, anxiety, stress [59] and mindfulness [50] |                                                                                                                                                                                                                                                                                                                                                                                                                                                                                             |

---

(MAAS) of the experimental group were statistically higher than the control group ( $p = .006$ ). When the mean scores obtained in the pre-test, post-test and follow-up measurements were compared, the mean scores of MAAS increased ( $p = .000$ ) and stress scores decreased significantly in the experimental group ( $p = .004$ ). No statistically significant differences in depression scores.

---
